# Supplementary material for: Defect-engineered MOF-801 for cycloaddition of CO2 with epoxides
Source: Royal Society of Chemistry journal article supplement (doi:10.1039/d2ta00503d), 2022-01-01
Supplement: d2ta00503d1.pdf [file d2ta00503d1.pdf]

## Supplemental Information

### Defect-engineered MOF-801 for cycloaddition of CO<sub>2</sub> with epoxides

Yunjang Gu,<sup>a</sup> Bai Amutha Anjali,<sup>a</sup> Sunghyun Yoon,<sup>a</sup> Youngson Choe,<sup>a</sup> Yongchul G. Chung,<sup>\*</sup>  
<sup>a</sup> and Dae-Won Park<sup>\* a</sup>

<sup>a</sup>*School of Chemical Engineering, Pusan National University, Busan, 46241, Korea*

\*Corresponding author: [dwpark@pusan.ac.kr](mailto:dwpark@pusan.ac.kr) (D.W. Park), [drygchung@gmail.com](mailto:drygchung@gmail.com) (Y.G. Chung)

## List of Table

**Table S1** Simulated and experimental BET area computed by SESAMI.

**Table S2** Different constraints used for the linear programming.

**Table S1** Simulated and experimental BET area computed by SESAMI.

| MOF-801                 | BET area (m <sup>2</sup> /g) |
|-------------------------|------------------------------|
| Perfect crystal         | 686                          |
| mc-1                    | 966                          |
| mc-2                    | 1313                         |
| mc-3                    | 1125                         |
| mc-4                    | 1322                         |
| ml-1                    | 672                          |
| ml-2                    | 684                          |
| ml-3                    | 696                          |
| ml-4                    | 657                          |
| ml-5                    | 747                          |
| Experimental MOF-801(D) | 832                          |
| Experimental MOF-801(P) | 707                          |

mc: missing cluster, ml: missing linker.

**Table S2** Different constraints used for the linear programming.

| Method | Constraint                                                                                                                                                                                                                                                                                                                                                              |
|--------|-------------------------------------------------------------------------------------------------------------------------------------------------------------------------------------------------------------------------------------------------------------------------------------------------------------------------------------------------------------------------|
| 1      | - Pressure range<br>- 0 ~ 0.0001 bar                                                                                                                                                                                                                                                                                                                                    |
| 2      | - Pressure range<br>- 0 ~ Monolayer coverage pressure point                                                                                                                                                                                                                                                                                                             |
| 3      | - Pressure range<br>- 0~ Monolayer coverage pressure point<br>- Saturation loading<br>- Relative error of saturation loading between master model isotherm and the experiment should be in plus or minus 5 %                                                                                                                                                            |
| 4      | - Pressure range<br>- Saturation loading<br>- Loading at low pressure<br>- 0~ Monolayer coverage pressure point<br>- Relative error of saturation loading between master model isotherm and the experiment should be in plus or minus 10 %<br>- Relative error of loading at 0.0001 bar should be in plus or minus 10 %                                                 |
| 5      | - Pressure range<br>- Saturation loading<br>- BET-surface area<br>- 0~ Monolayer coverage pressure point<br>- Relative error of saturation loading between master model isotherm and the experiment should be in plus or minus 10 %<br>- Relative error of calculated BET-surface area between master model isotherm and the experiment should be in plus or minus 10 % |

## List of Figures

**Fig. S1**  $\text{NH}_3$  and  $\text{CO}_2$ -TPD curves of MOF-801(D) and MOF-801(P).

**Fig. S2** Thermogravimetric analysis (TGA) and derivative thermogravimetry analysis (DTA) curves of MOF-801(D), and MOF-801(P). Calculation of fumarate ligands in MOF-801.

**Fig. S3** FE-SEM images of synthesized samples at different condition: (a) MOF-801(D), (b) MOF-801(P).

**Fig. S4** HR-TEM analysis of the defects in MOF-801(D) (a) HR-TEM image, (b) perfect crystal model, (c) defective structure model, (d) experimental image of defects.

**Fig. S5**  $\text{N}_2$  master model isotherm of MOF-801(P) at 77 K.

**Fig. S6**  $\text{N}_2$  master model isotherm of MOF-801(D) at 77 K.

**Fig. S7** Comparison of  $\text{CO}_2$  adsorption isotherms at 298 K for MOF-801(D) and MOF-801(P) with master isotherm.

**Fig. S8** Comparison between two methods 2D-NLDFT and Zeo++ PSD result for the kernel selection.

**Fig. S9** Comparison between 2D-NLDFT (Carbon, 77 K,  $\text{N}_2$  kernel) and Zeo++ PSD for pristine and Defect 1-1 to Defect 1-4.

**Fig. S10** Comparison between 2D-NLDFT (Carbon, 77 K,  $\text{N}_2$  kernel) and Zeo++ PSD for pristine and Defect 2-1 to Defect 2-5.

**Fig. S11** PXRD patterns of reused MOF-801(D) catalyst.

**Fig. S12** FT-IR spectra of reused MOF-801(D) catalyst.

**Fig. S13** Relative energy diagram of the un-catalyzed cycloaddition reaction of ECH and  $\text{CO}_2$  to form chloropropene carbonate.

**Fig. S14** Relative energy diagram of the -Br catalyzed cycloaddition reaction of ECH and  $\text{CO}_2$

to form chloropropene carbonate.

**Fig. S15** N<sub>2</sub> adsorption isotherms of MOF-801(D) and MOF-801(P).

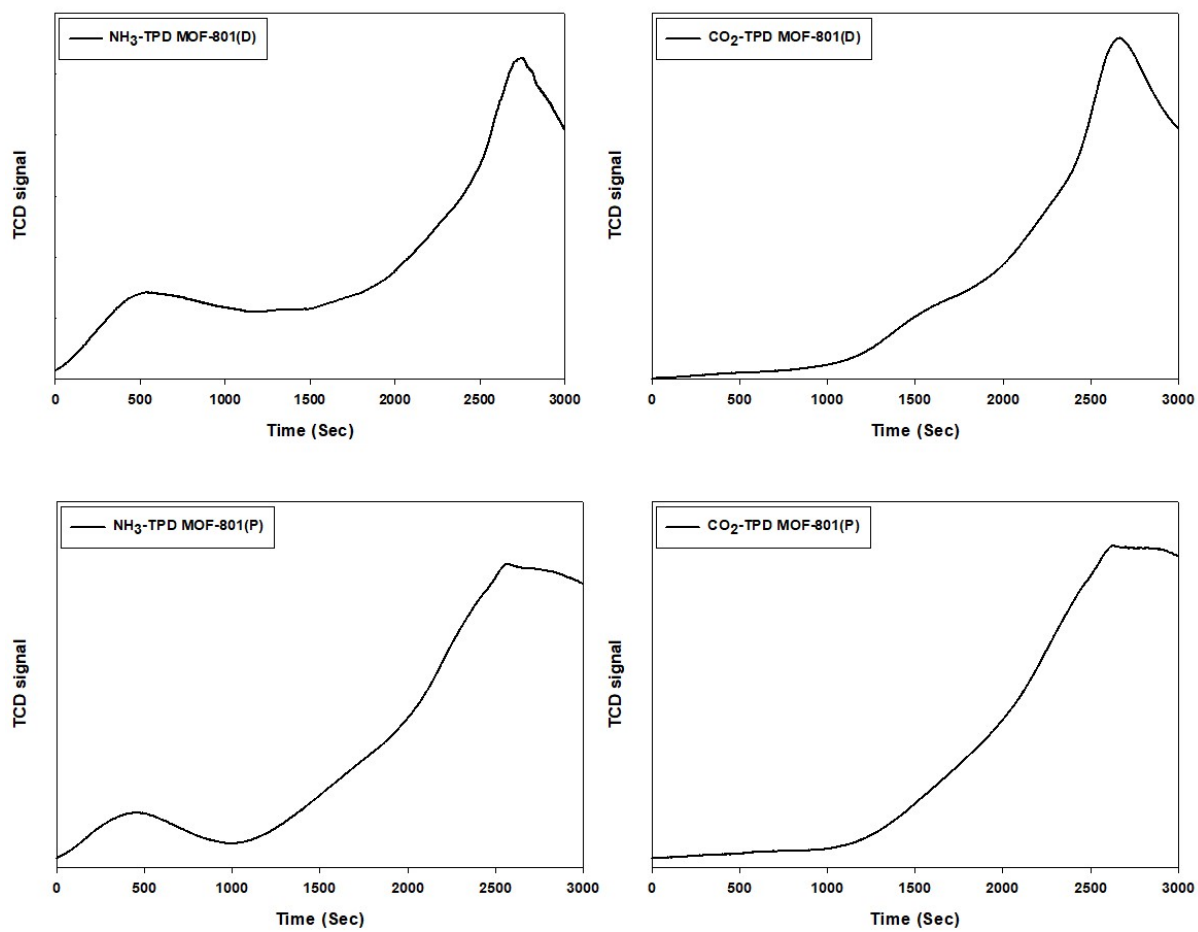

**Fig. S1** NH<sub>3</sub> and CO<sub>2</sub>-TPD curves of MOF-801(D) and MOF-801(P).

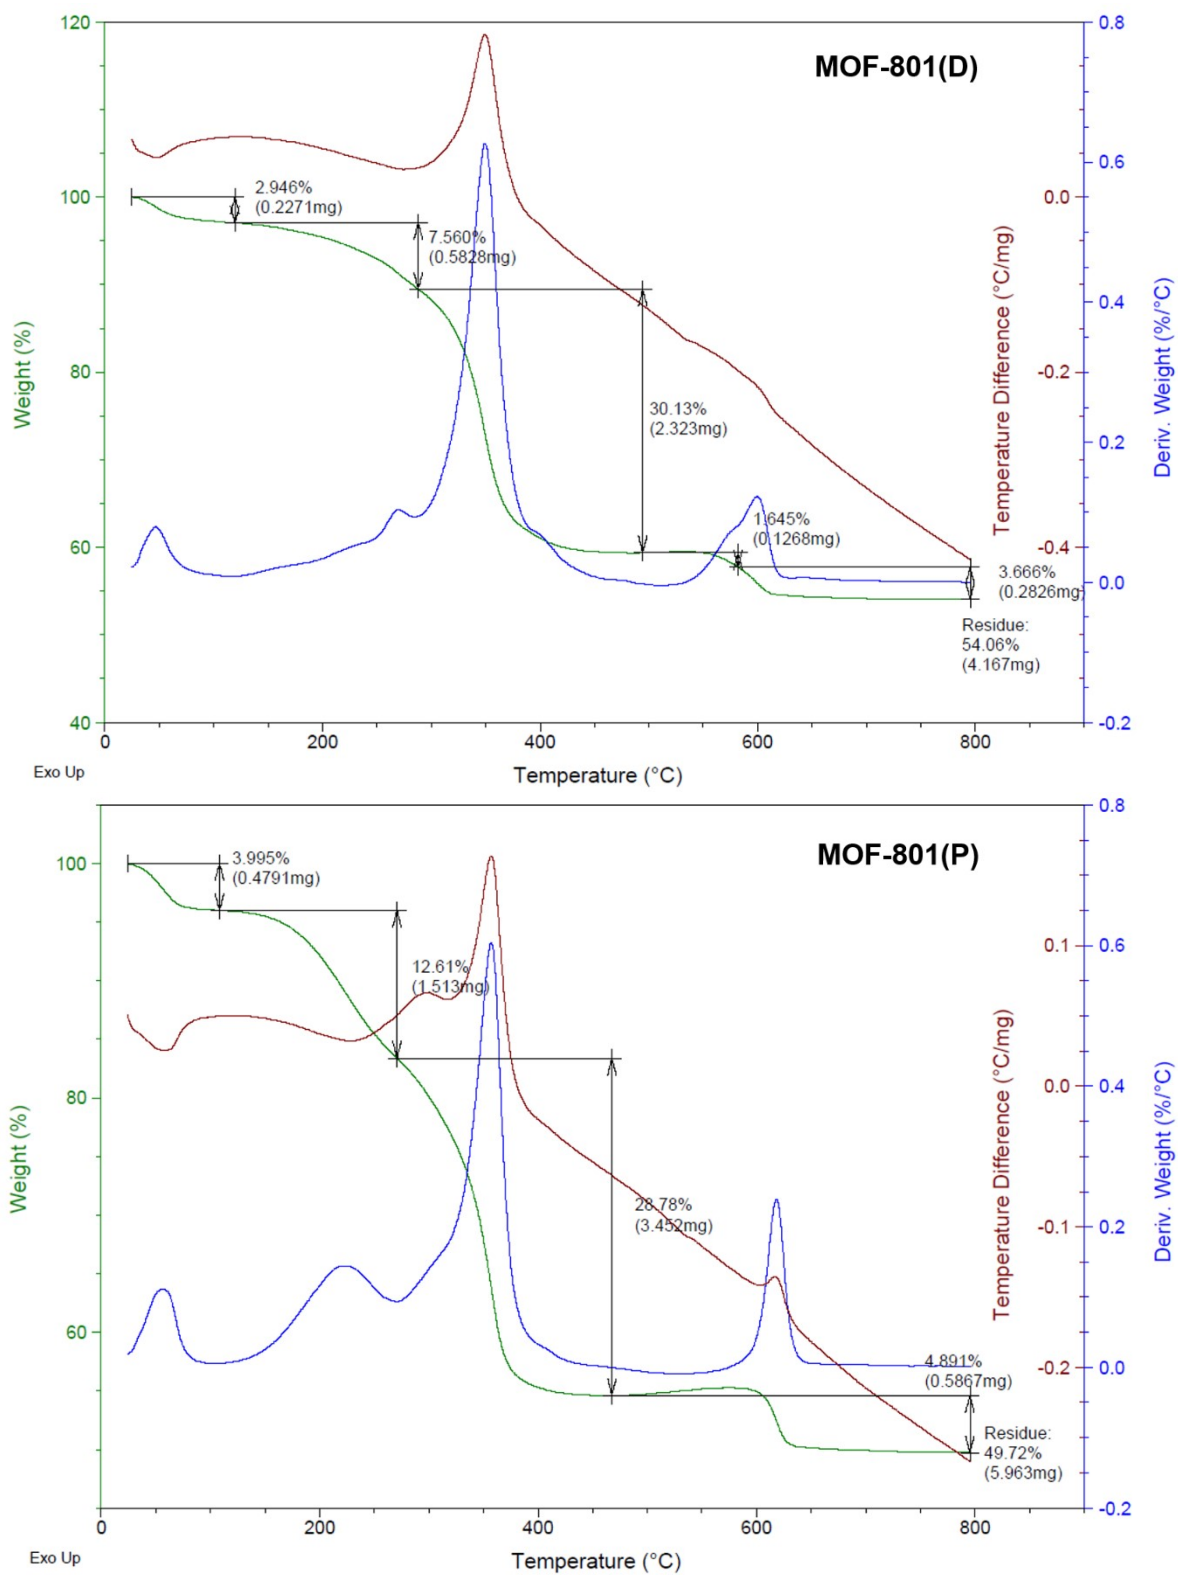

**Fig. S2** Thermogravimetric analysis (TGA) and derivative thermogravimetry analysis (DTA) curves of MOF-801(D), and MOF-801(P). Calculation of fumarate ligands in MOF-801.



### Calculation of fumarate ligands in MOF-801

MOF-801(P) showed larger weight loss near 400 °C than MOF-801(D). Since MOF-801(P) contains more fumarate ligands in the framework, the weight loss originated from their decomposition could be higher than MOF-801(D) containing smaller number of the ligands. The total weight loss in wt.% between 100 °C (ligand containing state) and 500 °C (ligands are decomposed) for MOF-801(P) and MOF-801(D) was calculated to be 43.1% and 38.8%, respectively. The detailed calculations are;

$$\text{MOF-801(P): } (96.005-54.611)/96.005 = 43.1 \%$$

$$\text{MOF-801(D): } (97.054-59.371)/97.054 = 38.8 \%$$

Since dehydrated formula of MOF-801 is known as  $\text{Zr}_6\text{O}_6(\text{O}_2\text{C}-(\text{CH})_2-\text{CO}_2)_6$ , theoretical loss of all ligands to be calculated as follows:

$$\text{MW of } \text{Zr}_6\text{O}_6(\text{O}_2\text{C}-(\text{CH})_2-\text{CO}_2)_6 = 1327.448$$

$$\text{MW of } (\text{ZrO}_2)_6 = 739.272$$

$$\text{Theoretical loss of ligands in perfect crystal: } (1327.448-739.272)/1327.448 = 44.3 \%$$

One can see that MOF-801(P) is close to the perfect crystal.

If one of six ligands in the formula is missing to form a defect structure,

$$\text{MW of } \text{Zr}_6\text{O}_6(\text{O}_2\text{C}-(\text{CH})_2-\text{CO}_2)_5 = 1207.45$$

$$\text{Then estimated weight loss will be: } (1207.45-739.272)/1207.45 = 38.8 \%$$

Therefore, we can estimate that almost 1/6 ligand of its perfect crystal structure was missed in MOF-801 (D).

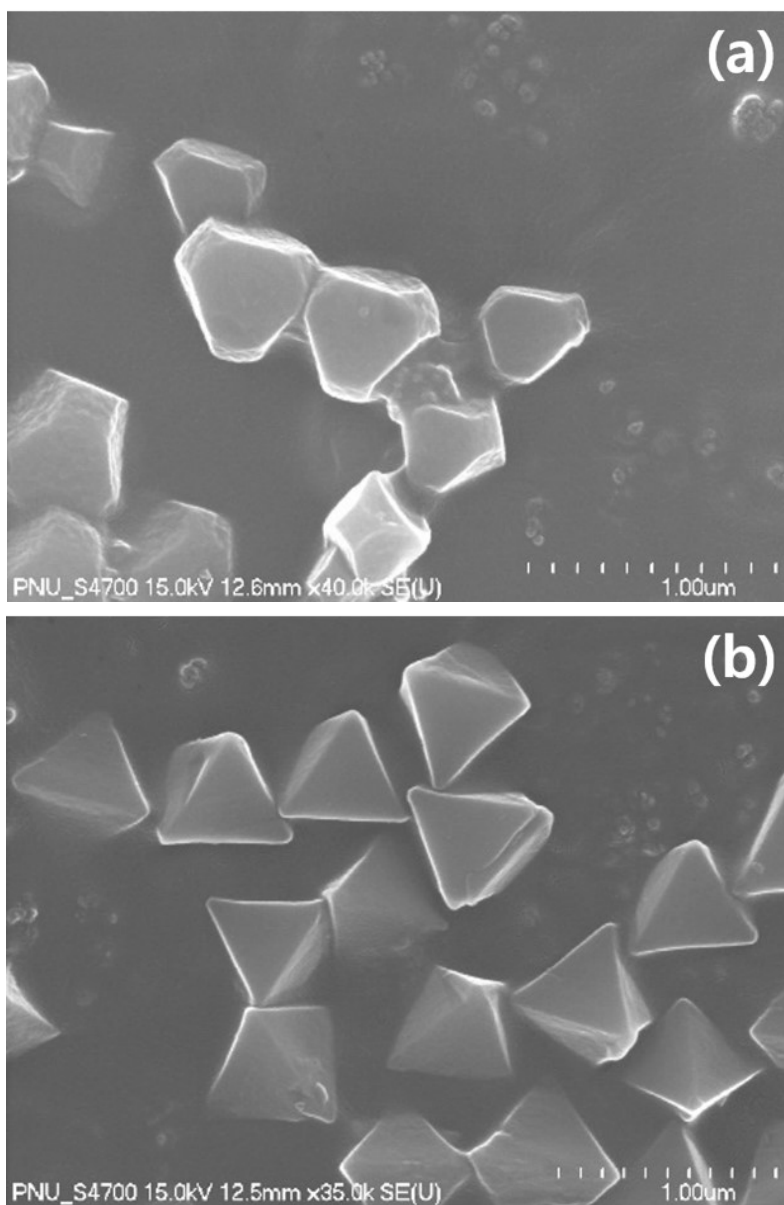

**Fig. S3** FE-SEM images of synthesized samples at different condition: (a) MOF-801(D), (b) MOF-801(P).

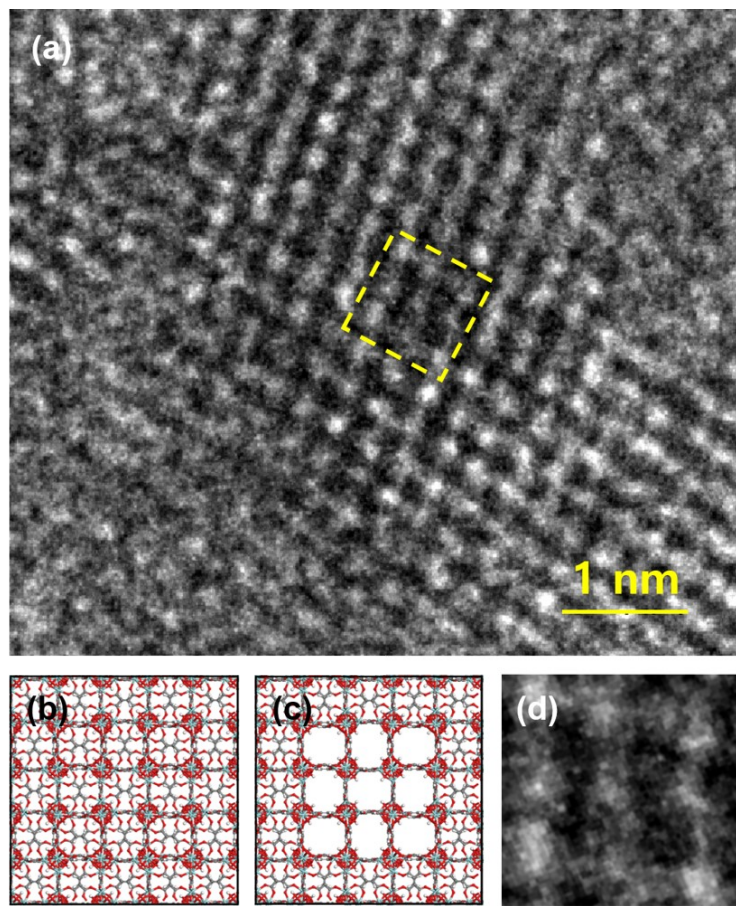

**Fig. S4** HR-TEM analysis of the defects in MOF-801(D) (a) HR-TEM image, (b) perfect crystal model, (c) defective structure model, (d) experimental image of defects.

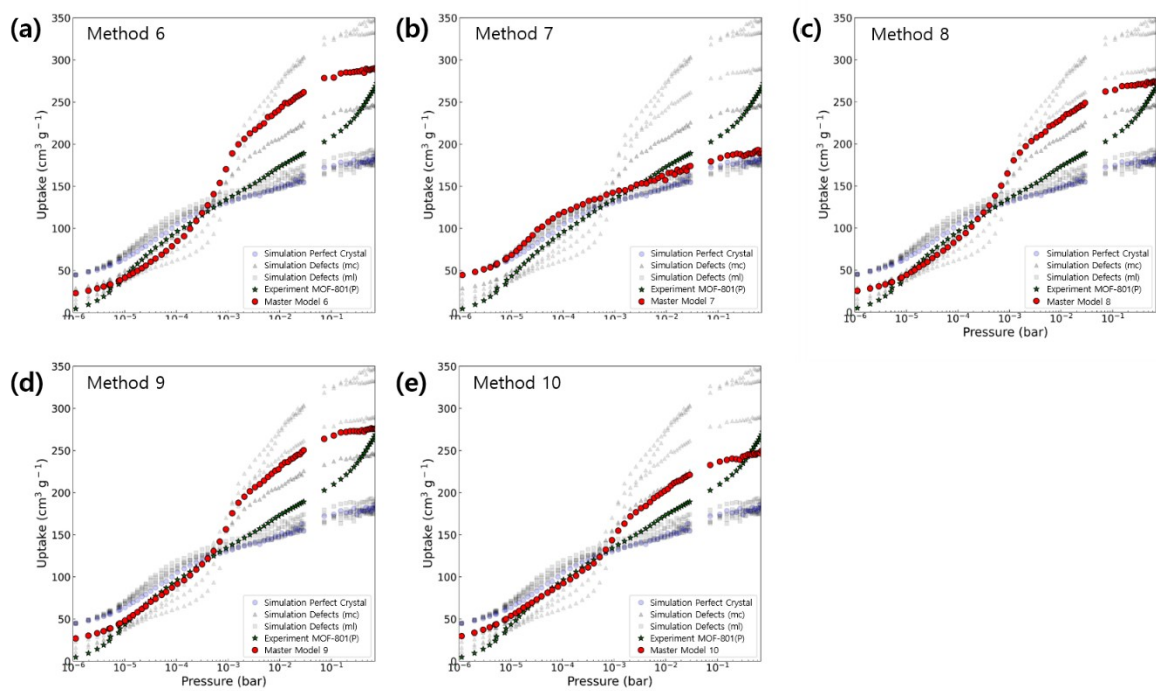

**Fig. S5**  $N_2$  master model isotherm of MOF-801(P) at 77 K.

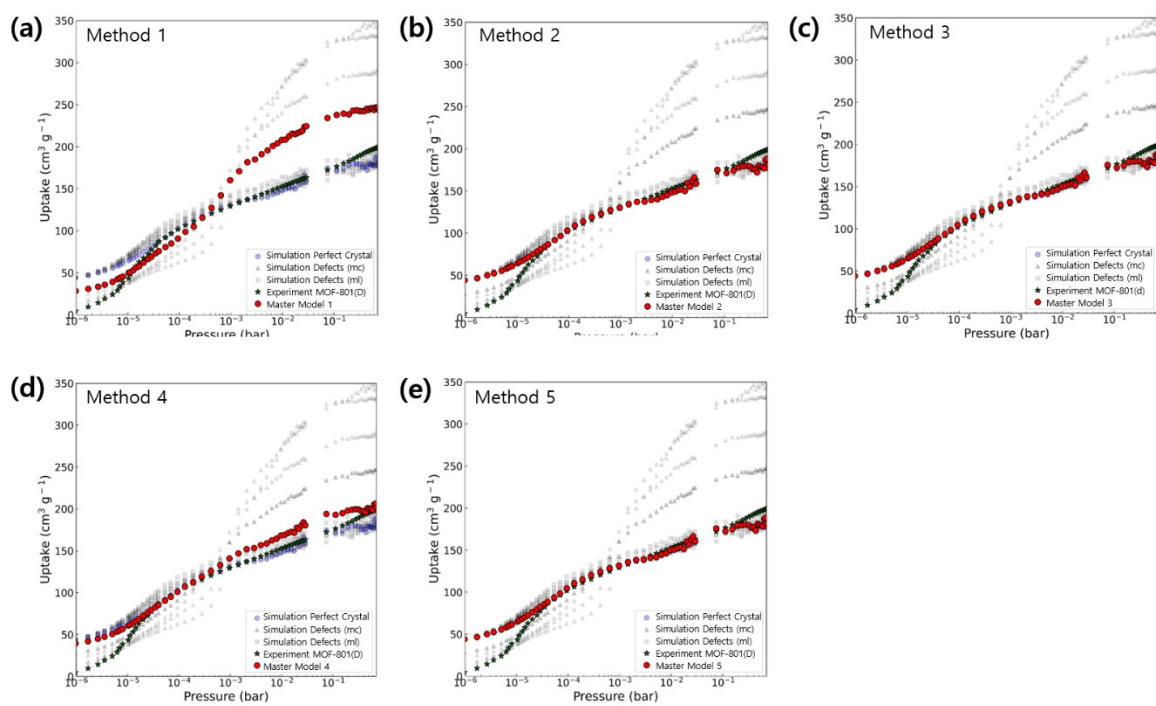

**Fig. S6**  $N_2$  master model isotherm of MOF-801(D) at 77 K.

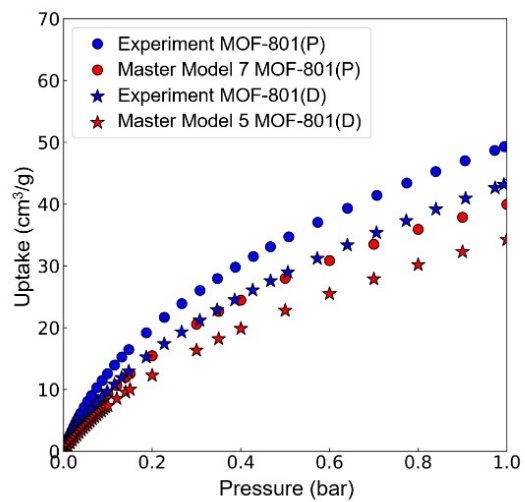

**Fig. S7** Comparison of CO<sub>2</sub> adsorption isotherms at 298 K for MOF-801(D) and MOF-801(P) with master isotherm.

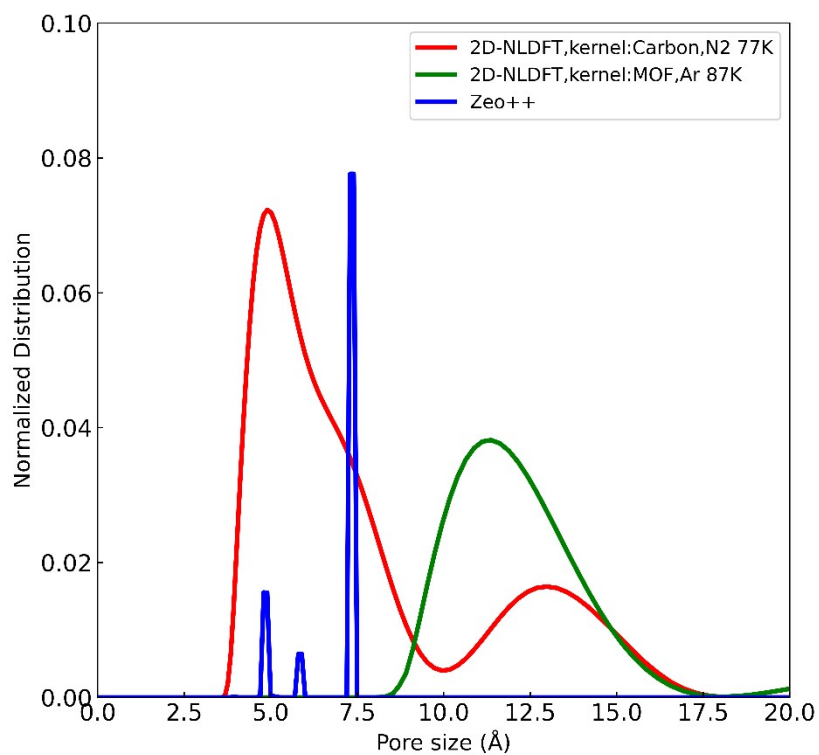

**Fig. S8** Comparison between two methods 2D-NLDFT and Zeo++ PSD result for the kernel selection.

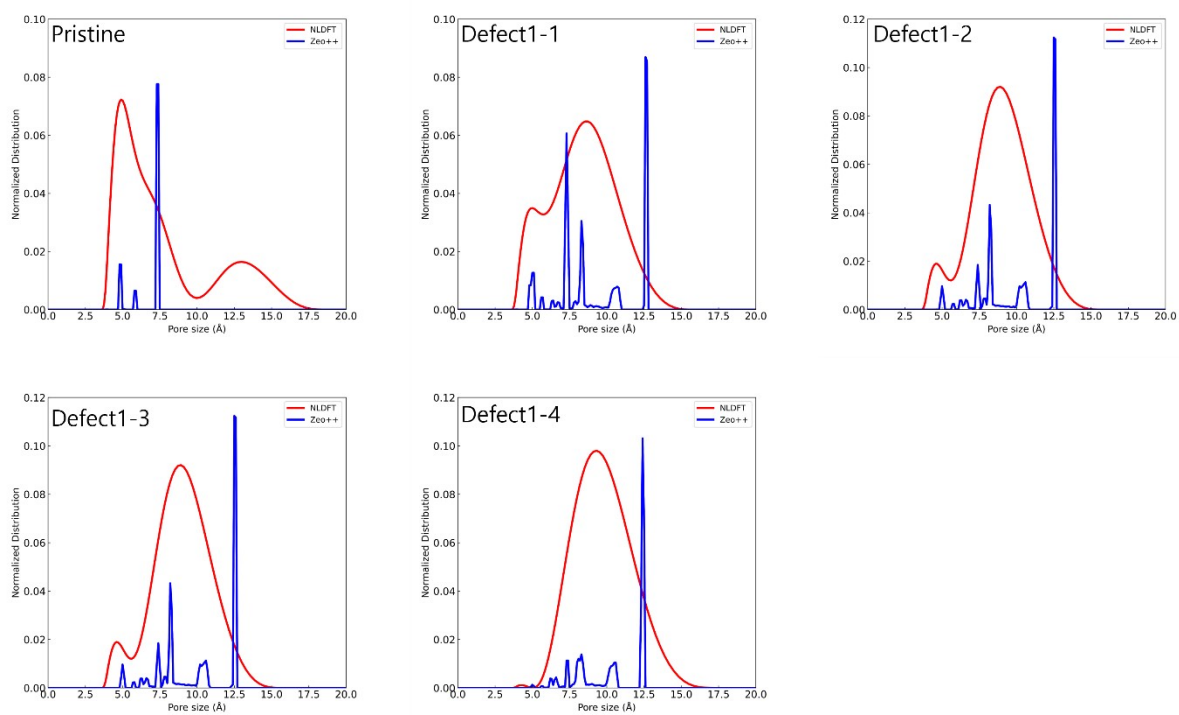

**Fig. S9** Comparison between 2D-NLDFT (Carbon, 77 K, N<sub>2</sub> kernel) and Zeo++ PSD for pristine and Defect 1-1 to Defect 1-4.



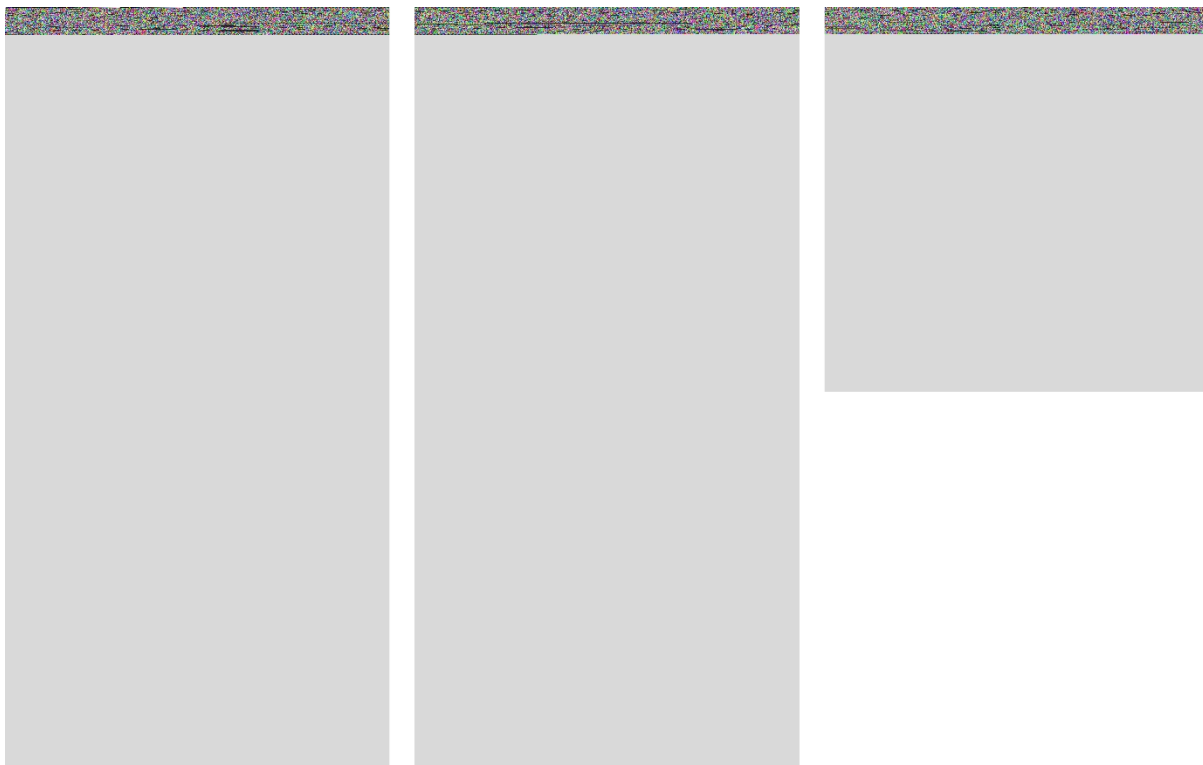

**Fig. S10** Comparison between 2D-NLDFT (Carbon, 77 K, N<sub>2</sub> kernel) and Zeo++ PSD for pristine and Defect 2-1 to Defect 2-5.

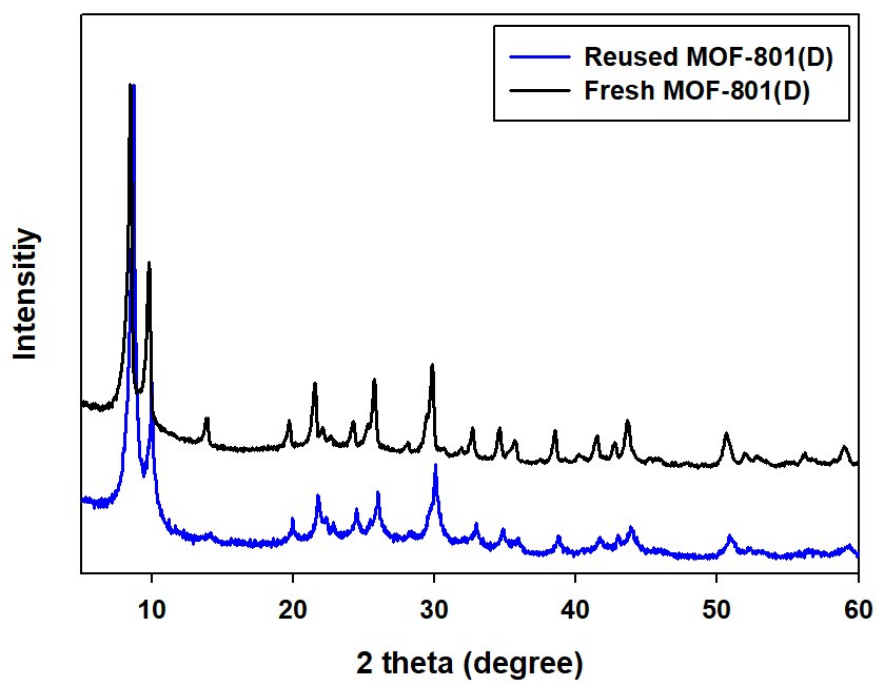

**Fig. S11** PXRD patterns of reused MOF-801(D) catalyst.

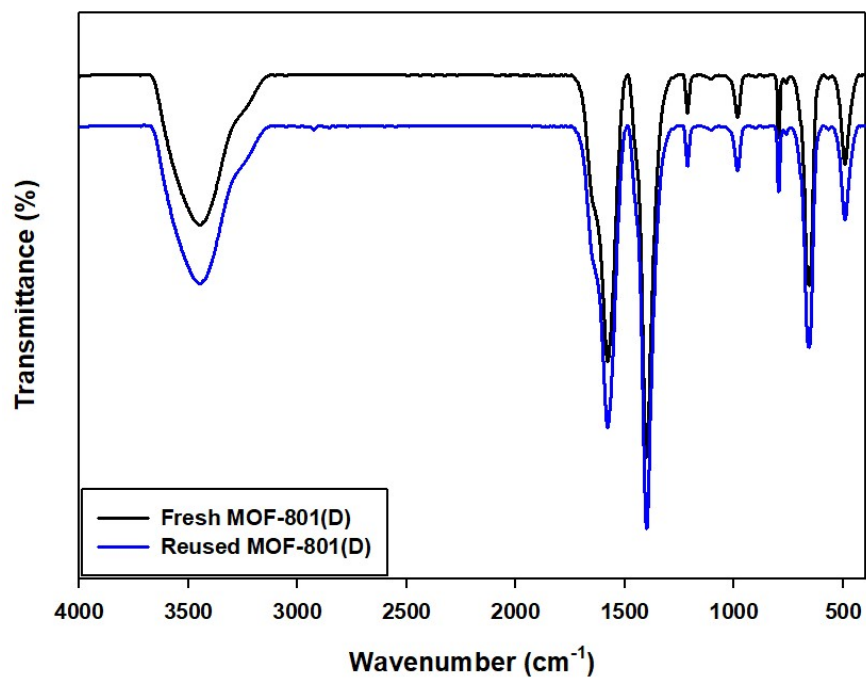

**Fig. S12** FT-IR spectra of reused MOF-801(D) catalyst.

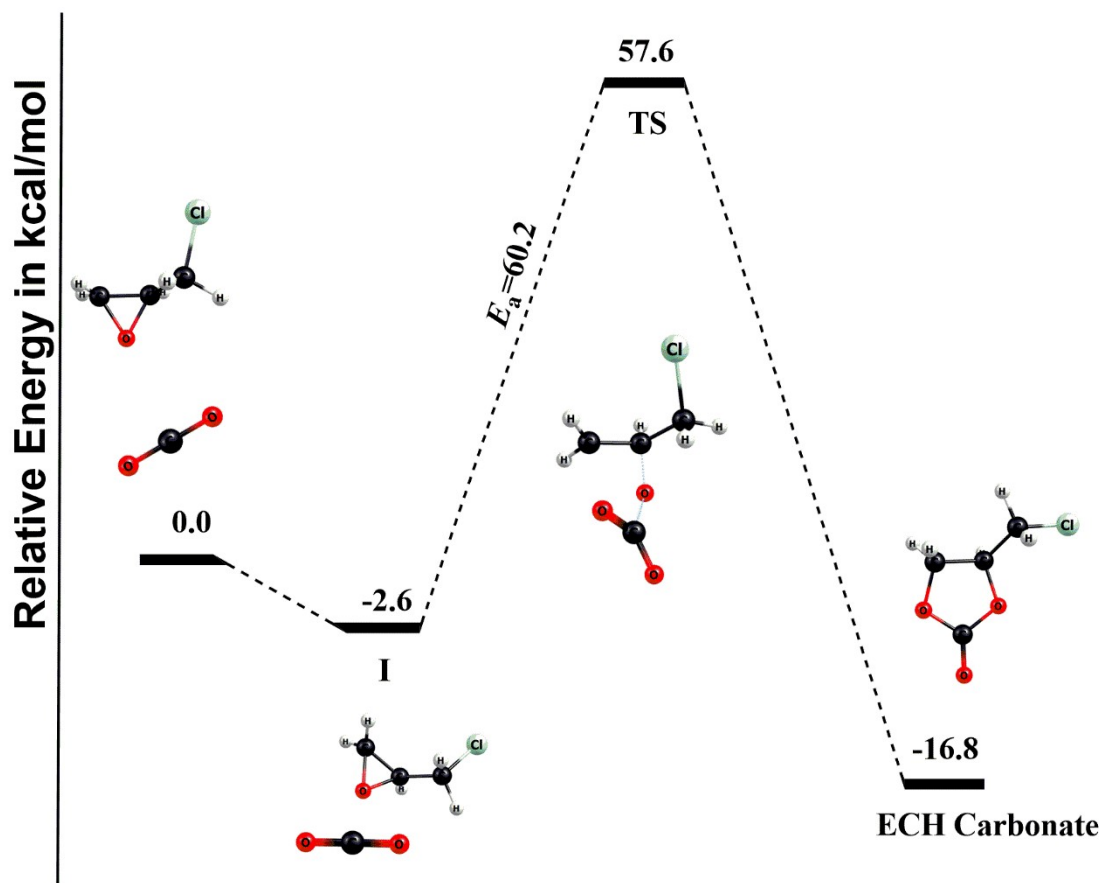

Fig. S13 Relative energy diagram of the un-catalyzed cycloaddition reaction of ECH and CO<sub>2</sub> to form chloropropene carbonate.

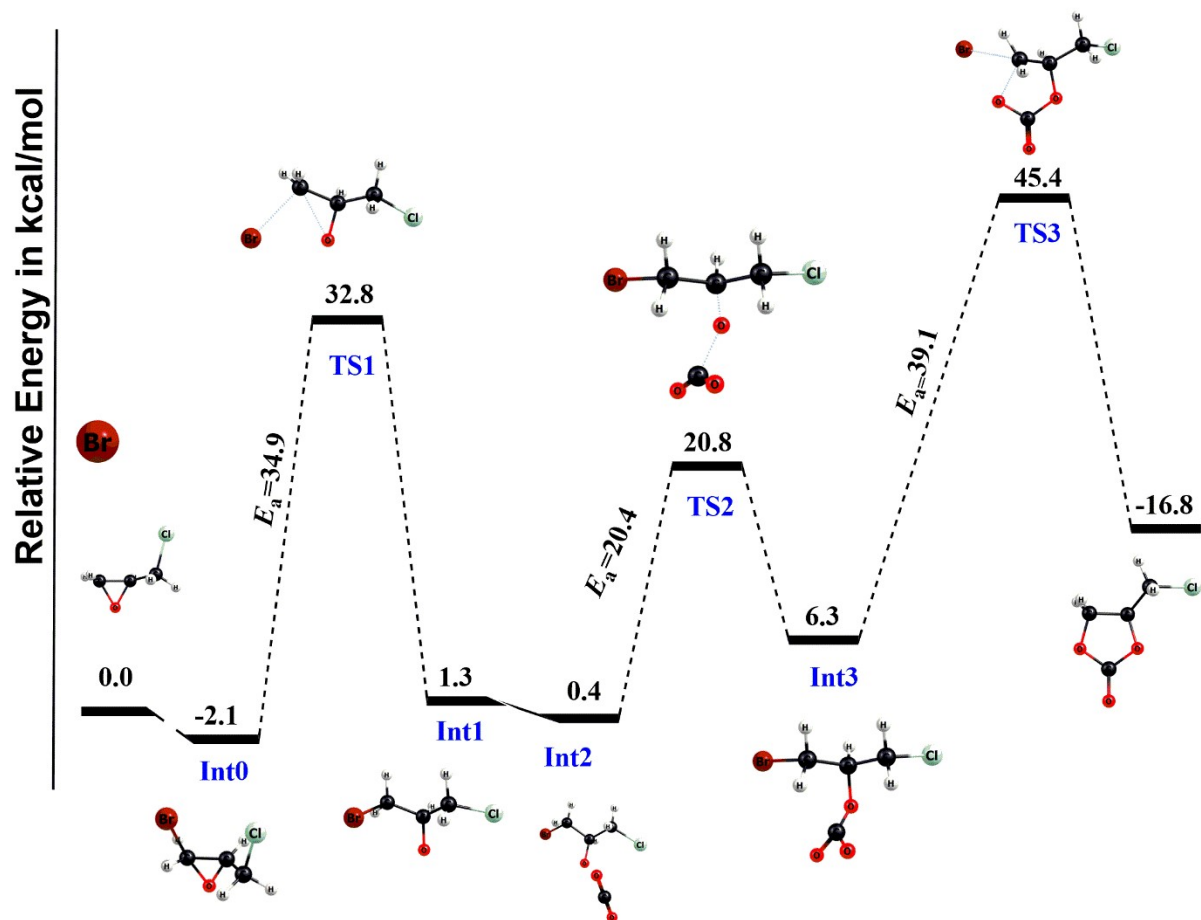

Fig. S14 Relative energy diagram of the -Br catalyzed cycloaddition reaction of ECH and CO<sub>2</sub> to form chloropropene carbonate.

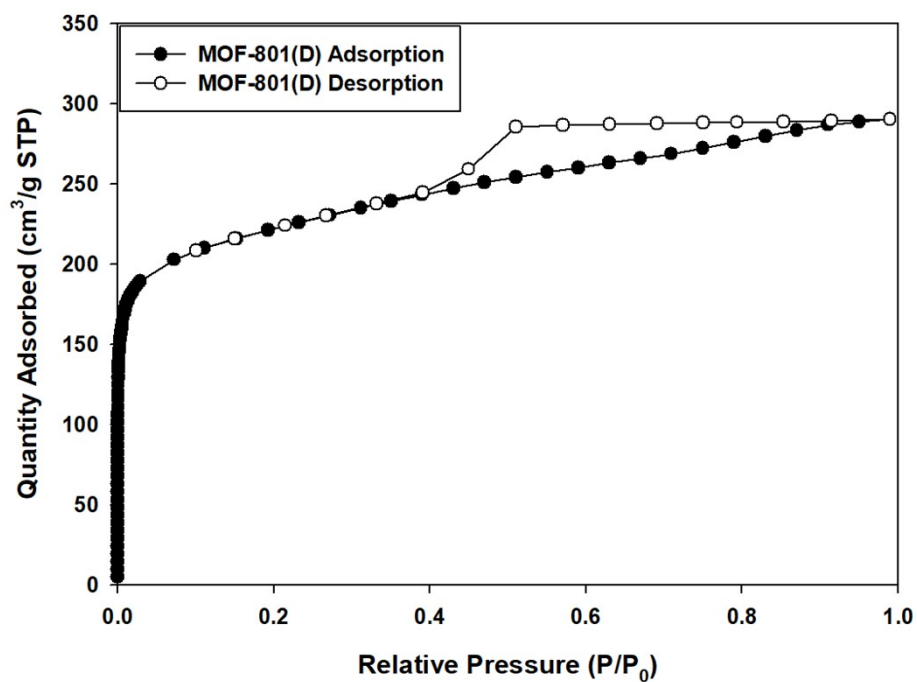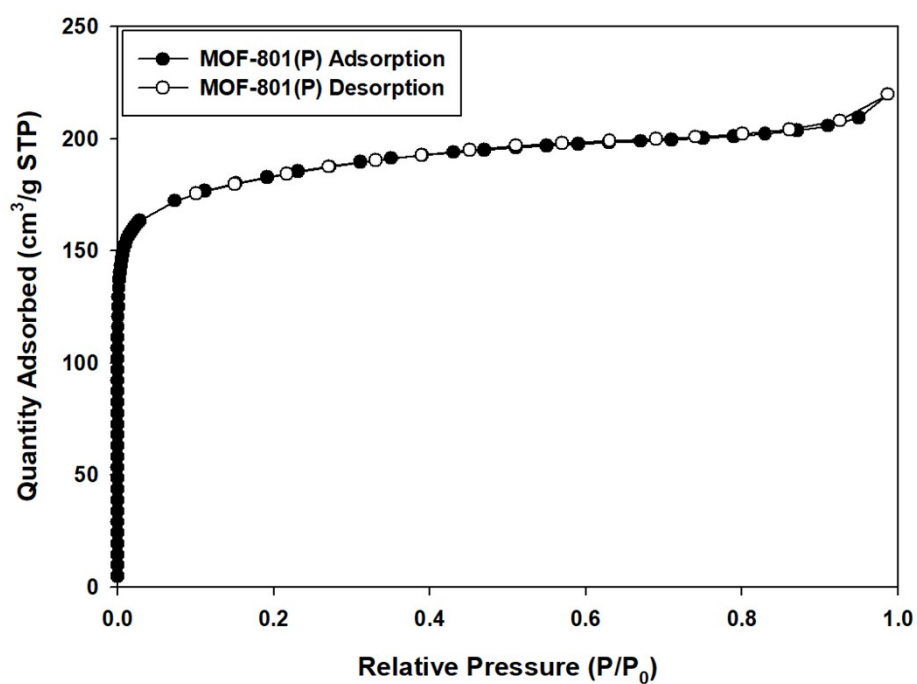

Fig. S15 N<sub>2</sub> adsorption isotherms of MOF-801(D) and MOF-801(P).
